# Supplementary material for: Genome-Wide Identification and Characterization of Salinity Stress-Responsive miRNAs in Wild Emmer Wheat (Triticum turgidum ssp. dicoccoides)
Source: MDPI journal article supplement (doi:10.3390/genes8060156), 2017-06-06
Supplement: s1 [file s1]

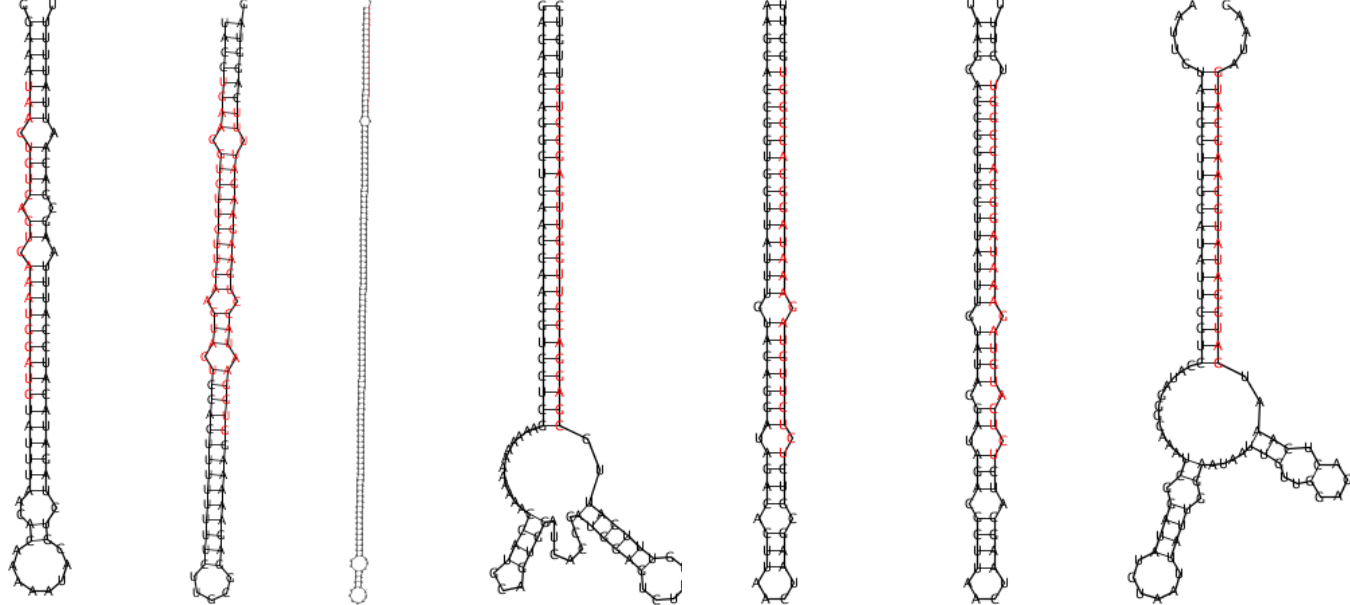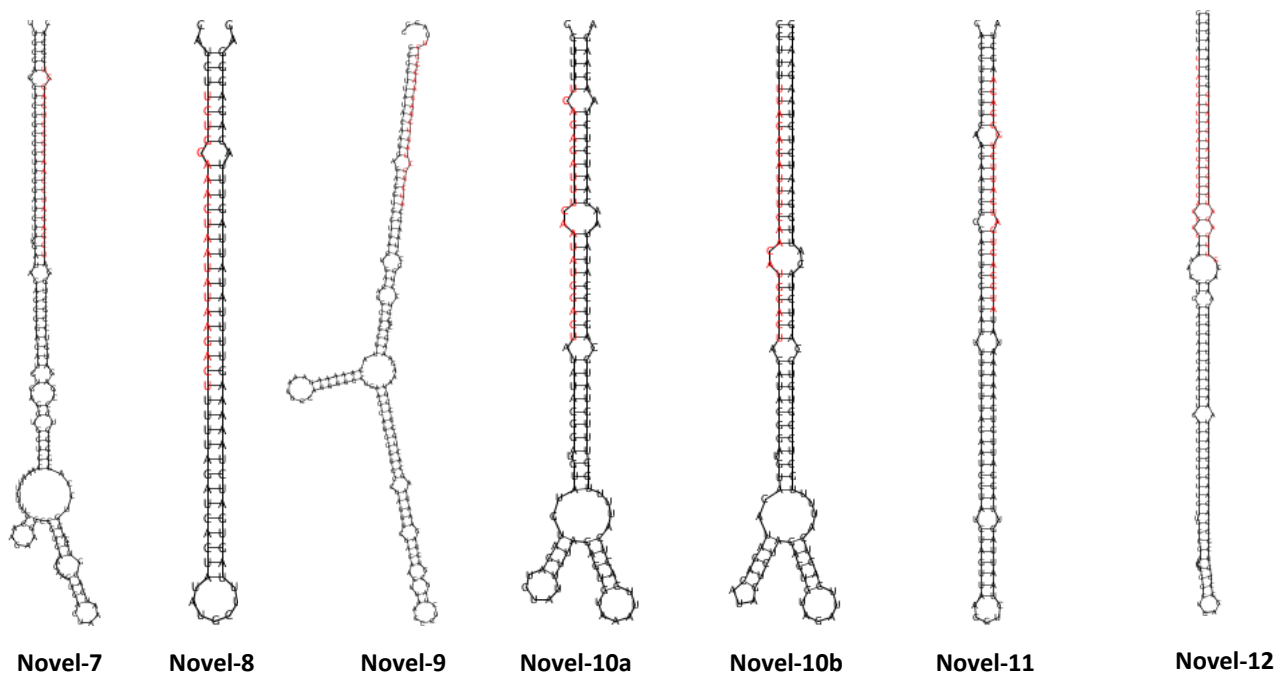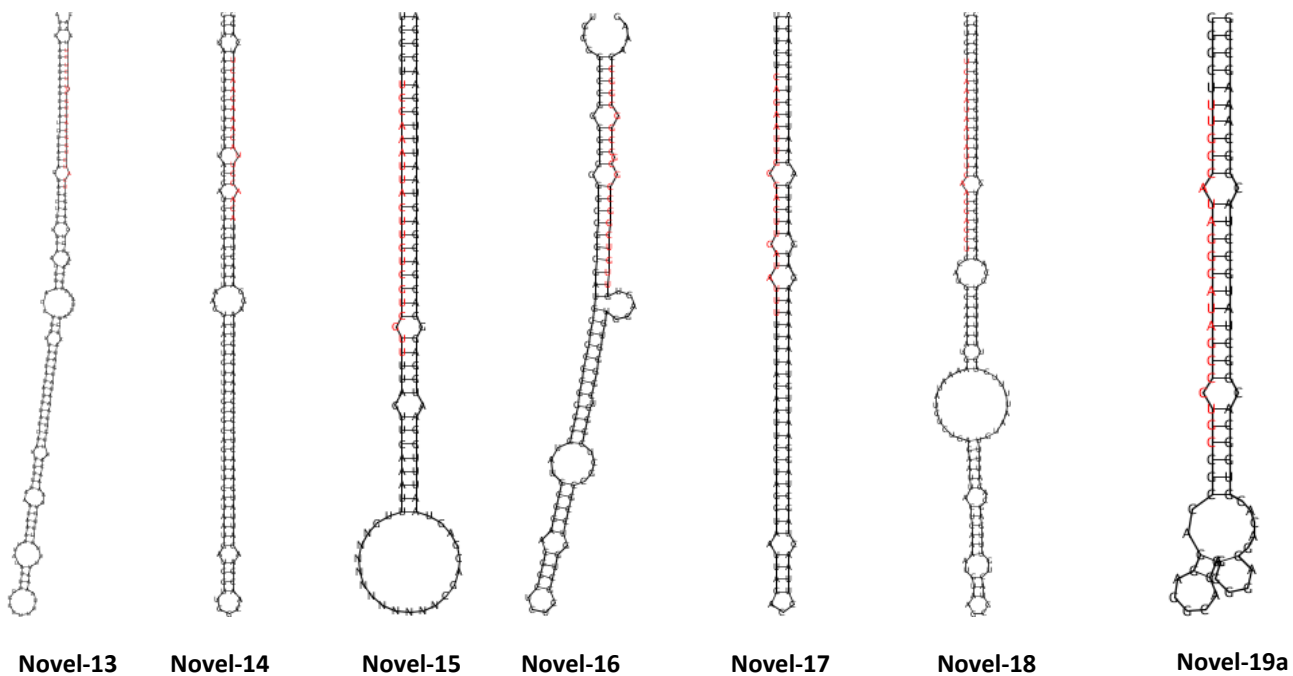

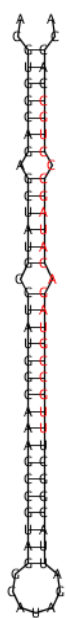

Novel-19b

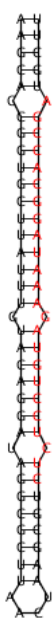

Novel-20

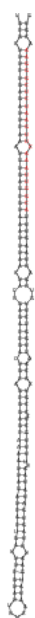

Novel-22a

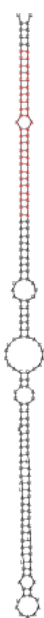

Novel-22b

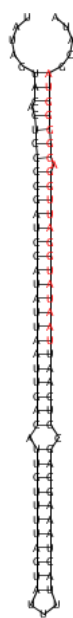

Novel-23

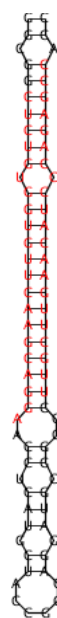

Novel-24

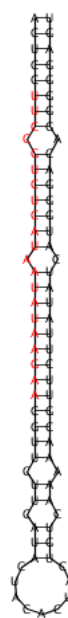

Novel-25

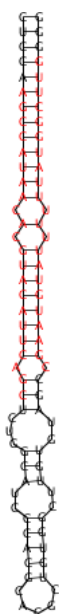

Novel-26

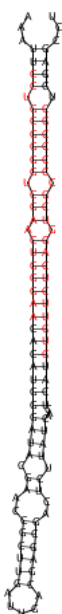

Novel-27

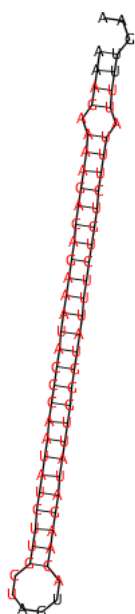

Novel-28a

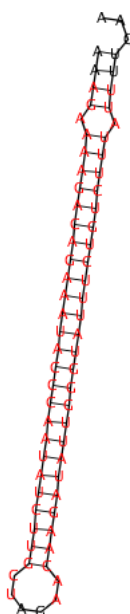

Novel-28b

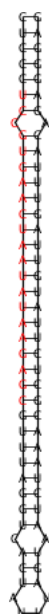

Novel-29

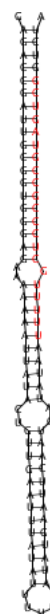

Novel-30

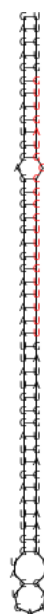

Novel-31

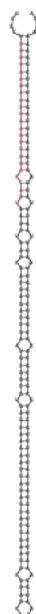

Novel-32

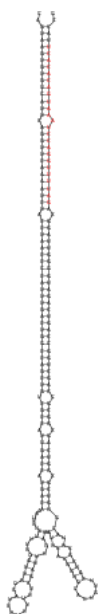

Novel-33

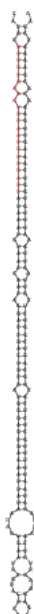

Novel-34a

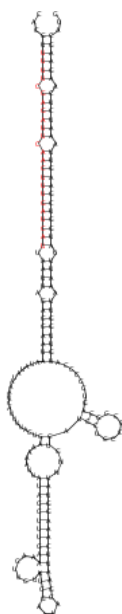

Novel-34b

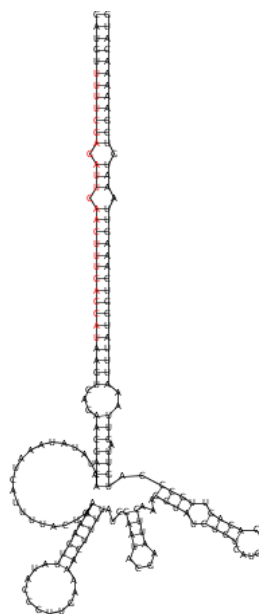

Novel-34c

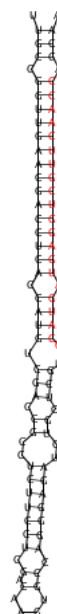

Novel-35

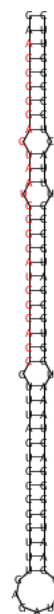

Novel-36

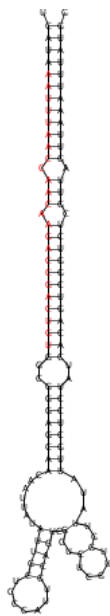

Novel-37

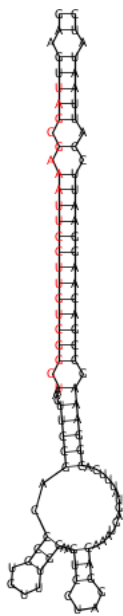

Novel-38

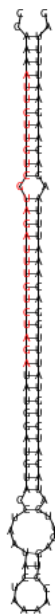

Novel-39

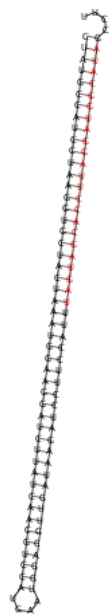

Novel-40

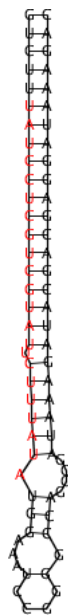

Novel-41

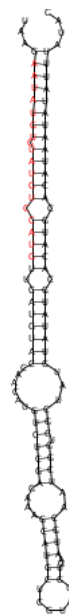

Novel-42

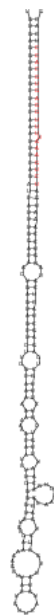

Novel-43

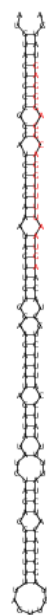

Novel-44

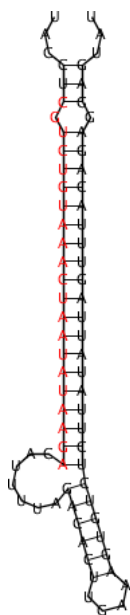

Novel-45

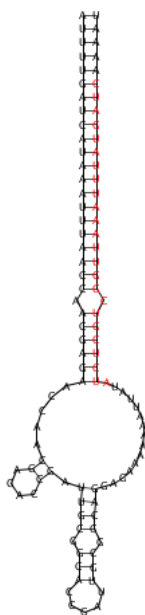

Novel-46

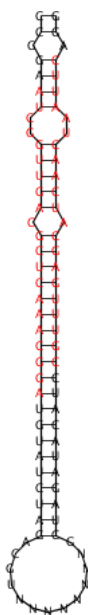

Novel-47

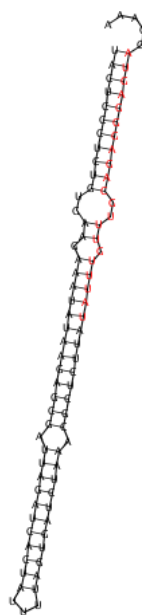

Novel-48

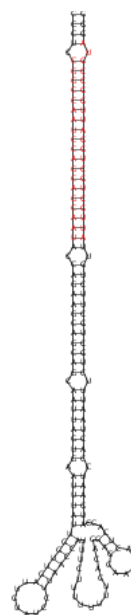

Novel-49

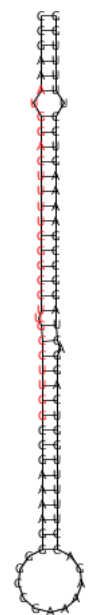

Novel-50

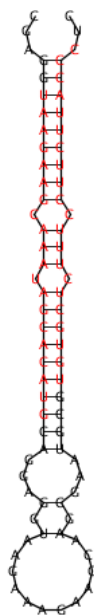

Novel-51

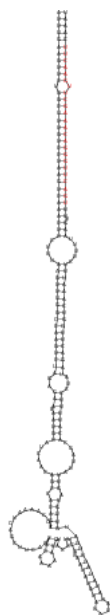

Novel-52

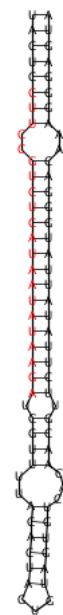

Novel-53

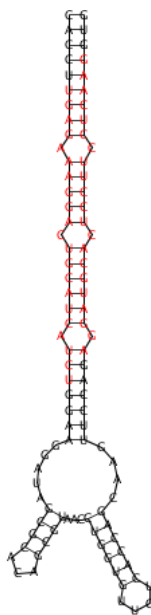

Novel-54

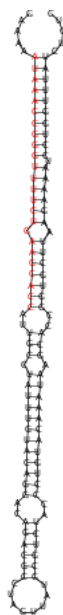

Novel-55

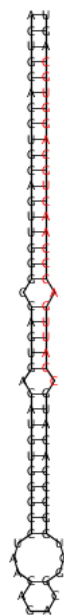

Novel-56

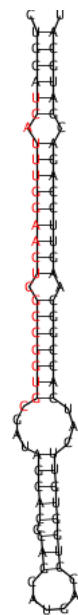

Novel-57

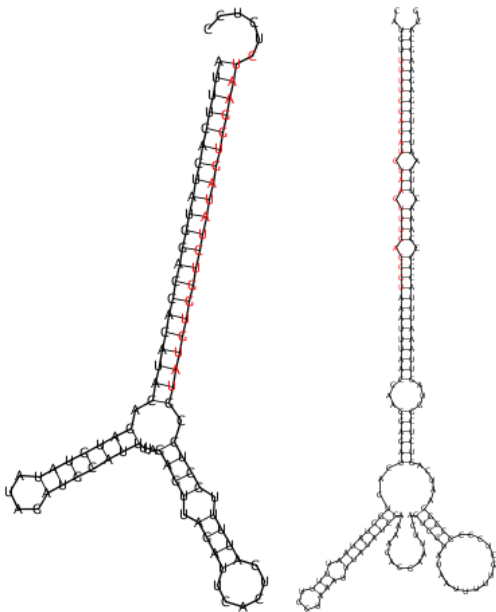

**Novel-58**

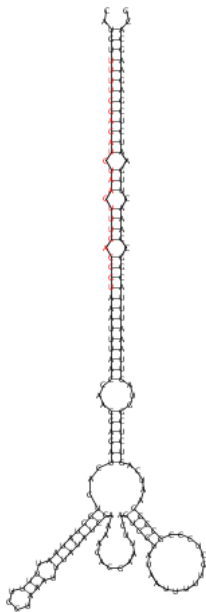

**Novel-59**

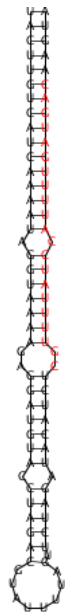

**Novel-60**

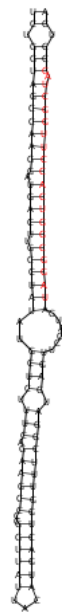

**Novel-61**

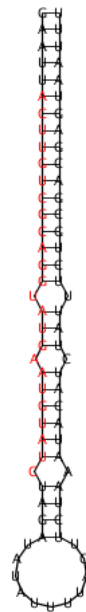

**Novel-62**

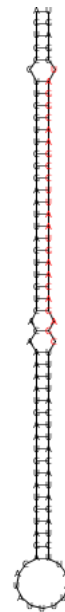

**Novel-63**

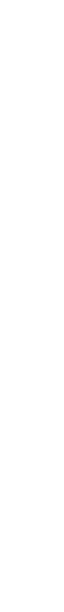

**Novel-64**

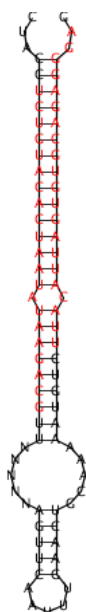

**Novel-65**

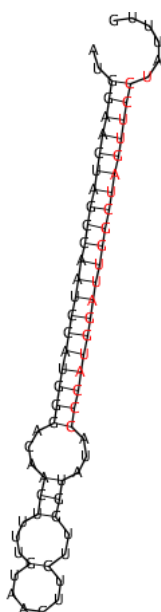

**Novel-66**

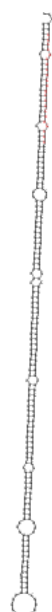

**Novel-67**

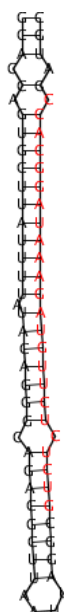

**Novel-68**

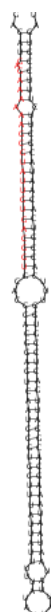

**Novel-69**

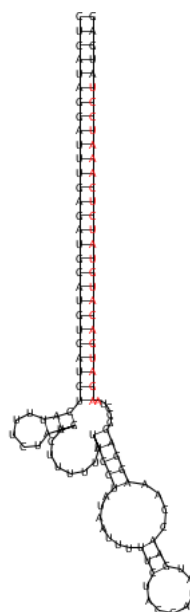

**Novel-70**

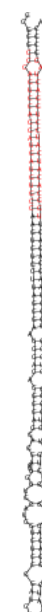

**Novel-71**

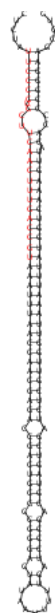

**Novel-72**

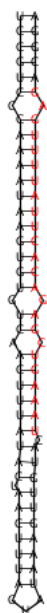

**Novel-73**

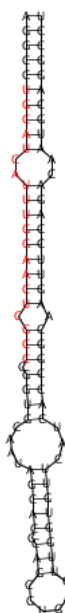

**Novel-74**

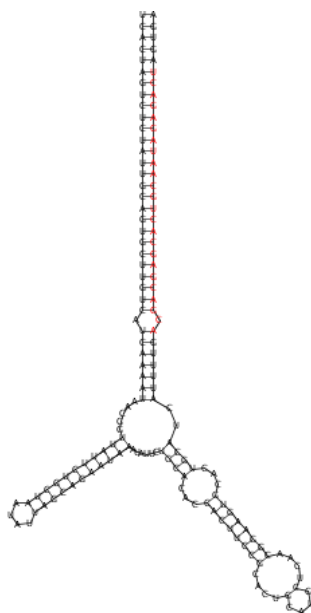

**Novel-75**

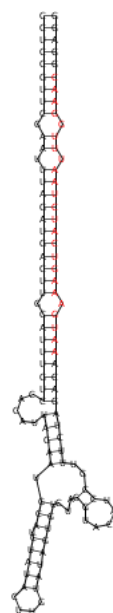

**Novel-76**

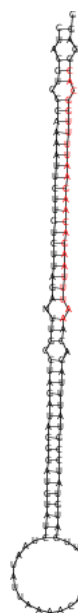

**Novel-77**

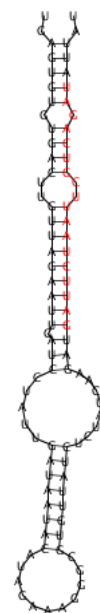

**Novel-78**

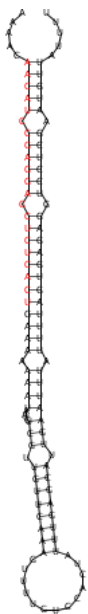

Novel-79

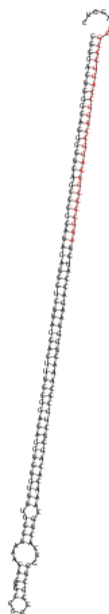

Novel-80

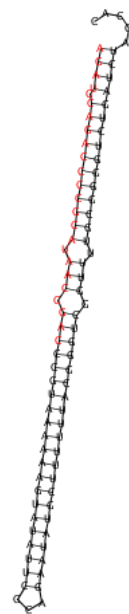

Novel-81

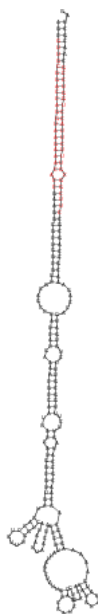

Novel-82

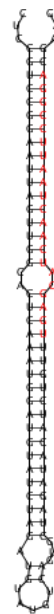

Novel-83

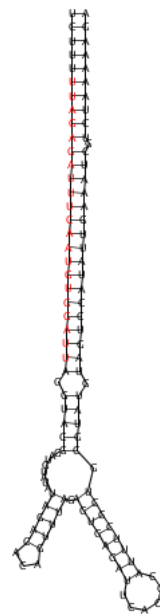

Novel-84

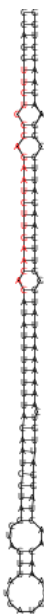

Novel-85

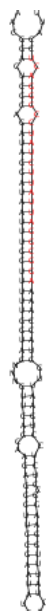

Novel-86

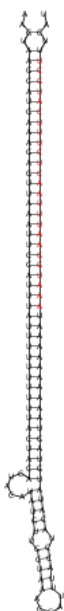

Novel-87

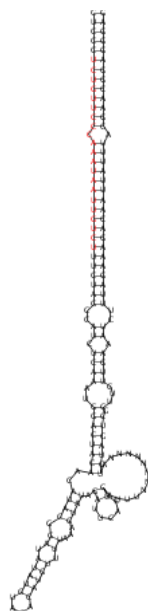

Novel-88

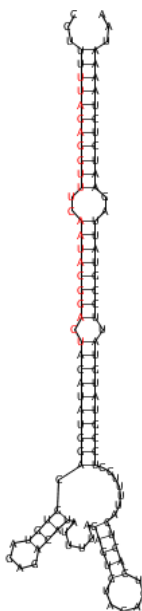

Novel-89

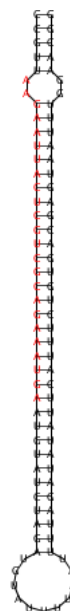

Novel-90

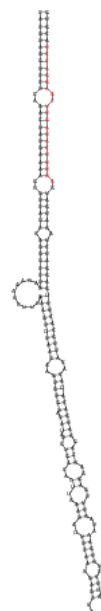

Novel-91

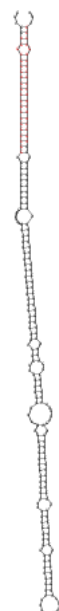

Novel-92

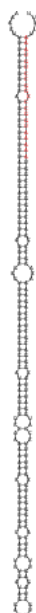

Novel-93

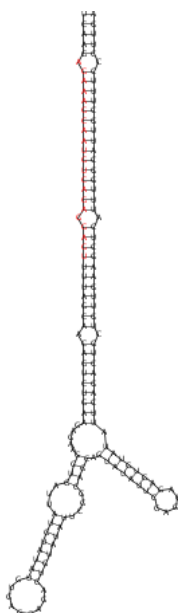

Novel-94

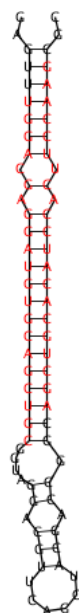

Novel-95

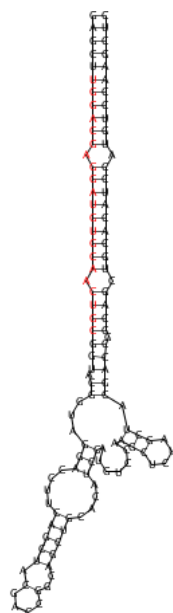

Novel-96

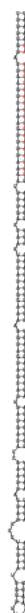

Novel-97

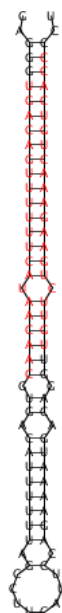

Novel-98

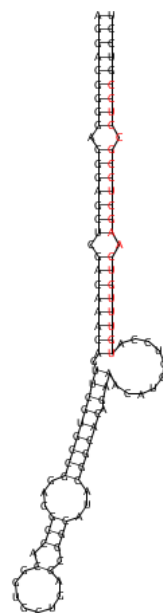

Novel-99

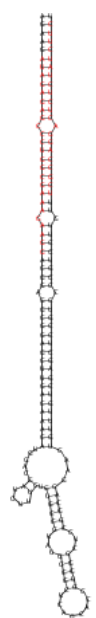

**Novel-100**

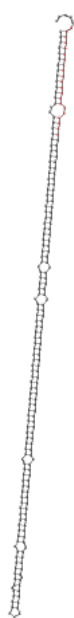

**Novel-101**

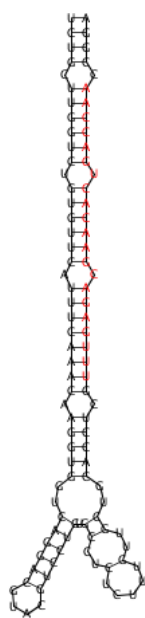

**Novel-102**

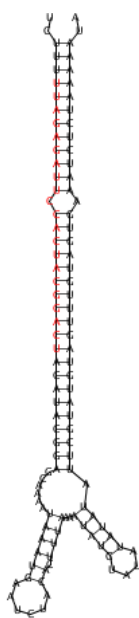

**Novel-103**

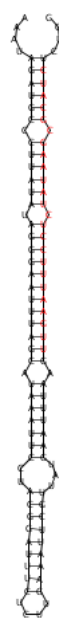

**Novel-104**

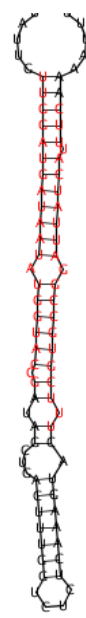

**Novel-105**

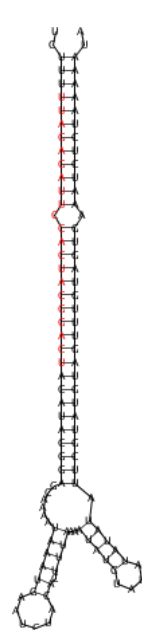

**Novel-106**

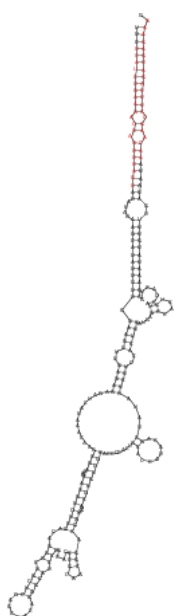

**Novel-107**

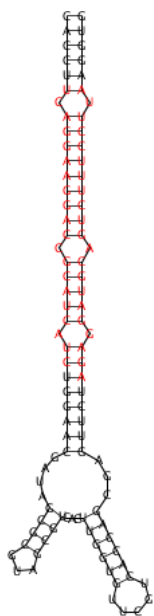

**Novel-108**

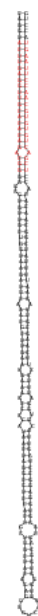

**Novel-109**

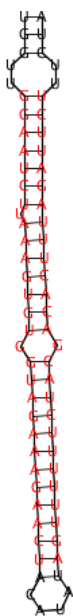

**Novel-110**

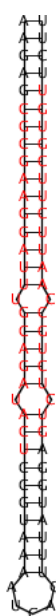

**Novel-111**

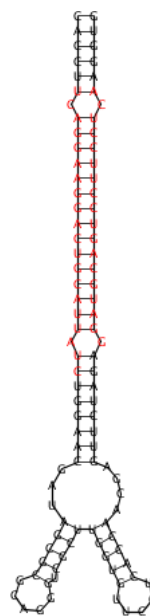

**Novel-112**

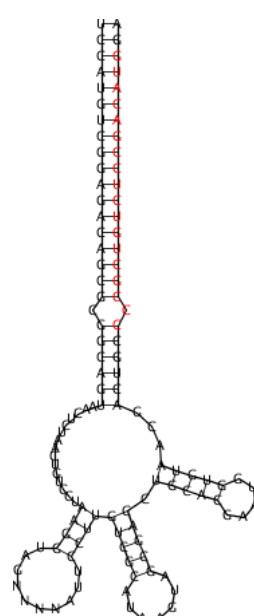

**Novel-113**

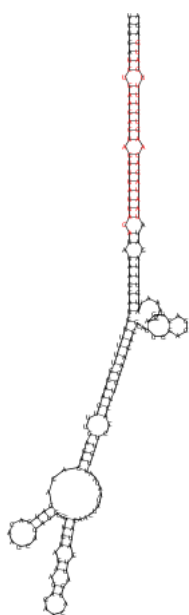

**Novel-114**

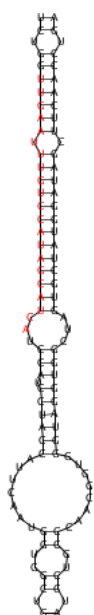

**Novel-115**

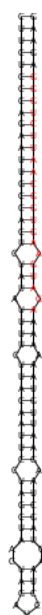

**Novel-116**

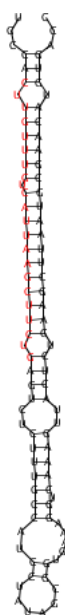

**Novel-117**

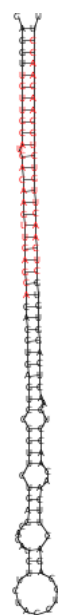

**Novel-118**

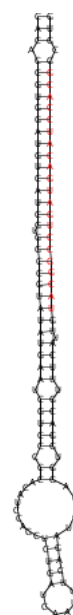

**Novel-119**

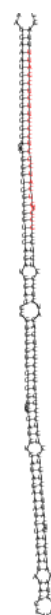

**Novel-120**

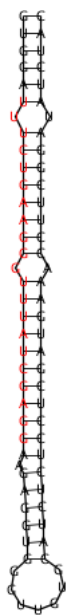

**Novel-121**

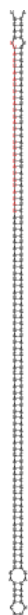

**Novel-122**

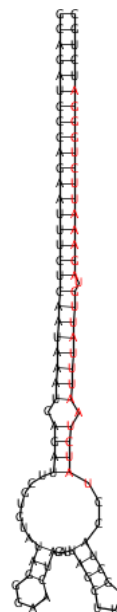

**Novel-123**

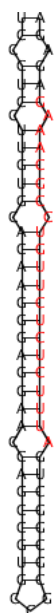

**Novel-121**

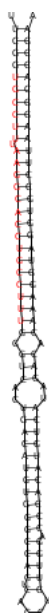

**Novel-122**

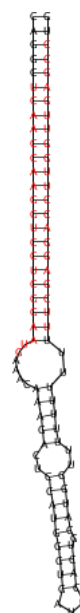

**Novel-123**
