# Supplementary figures and images for: Genome-Wide Identification and Characterization of Salinity Stress-Responsive miRNAs in Wild Emmer Wheat (Triticum turgidum ssp. dicoccoides)
Source: MDPI journal article supplement (doi:10.3390/genes8060156), 2017-06-06

A

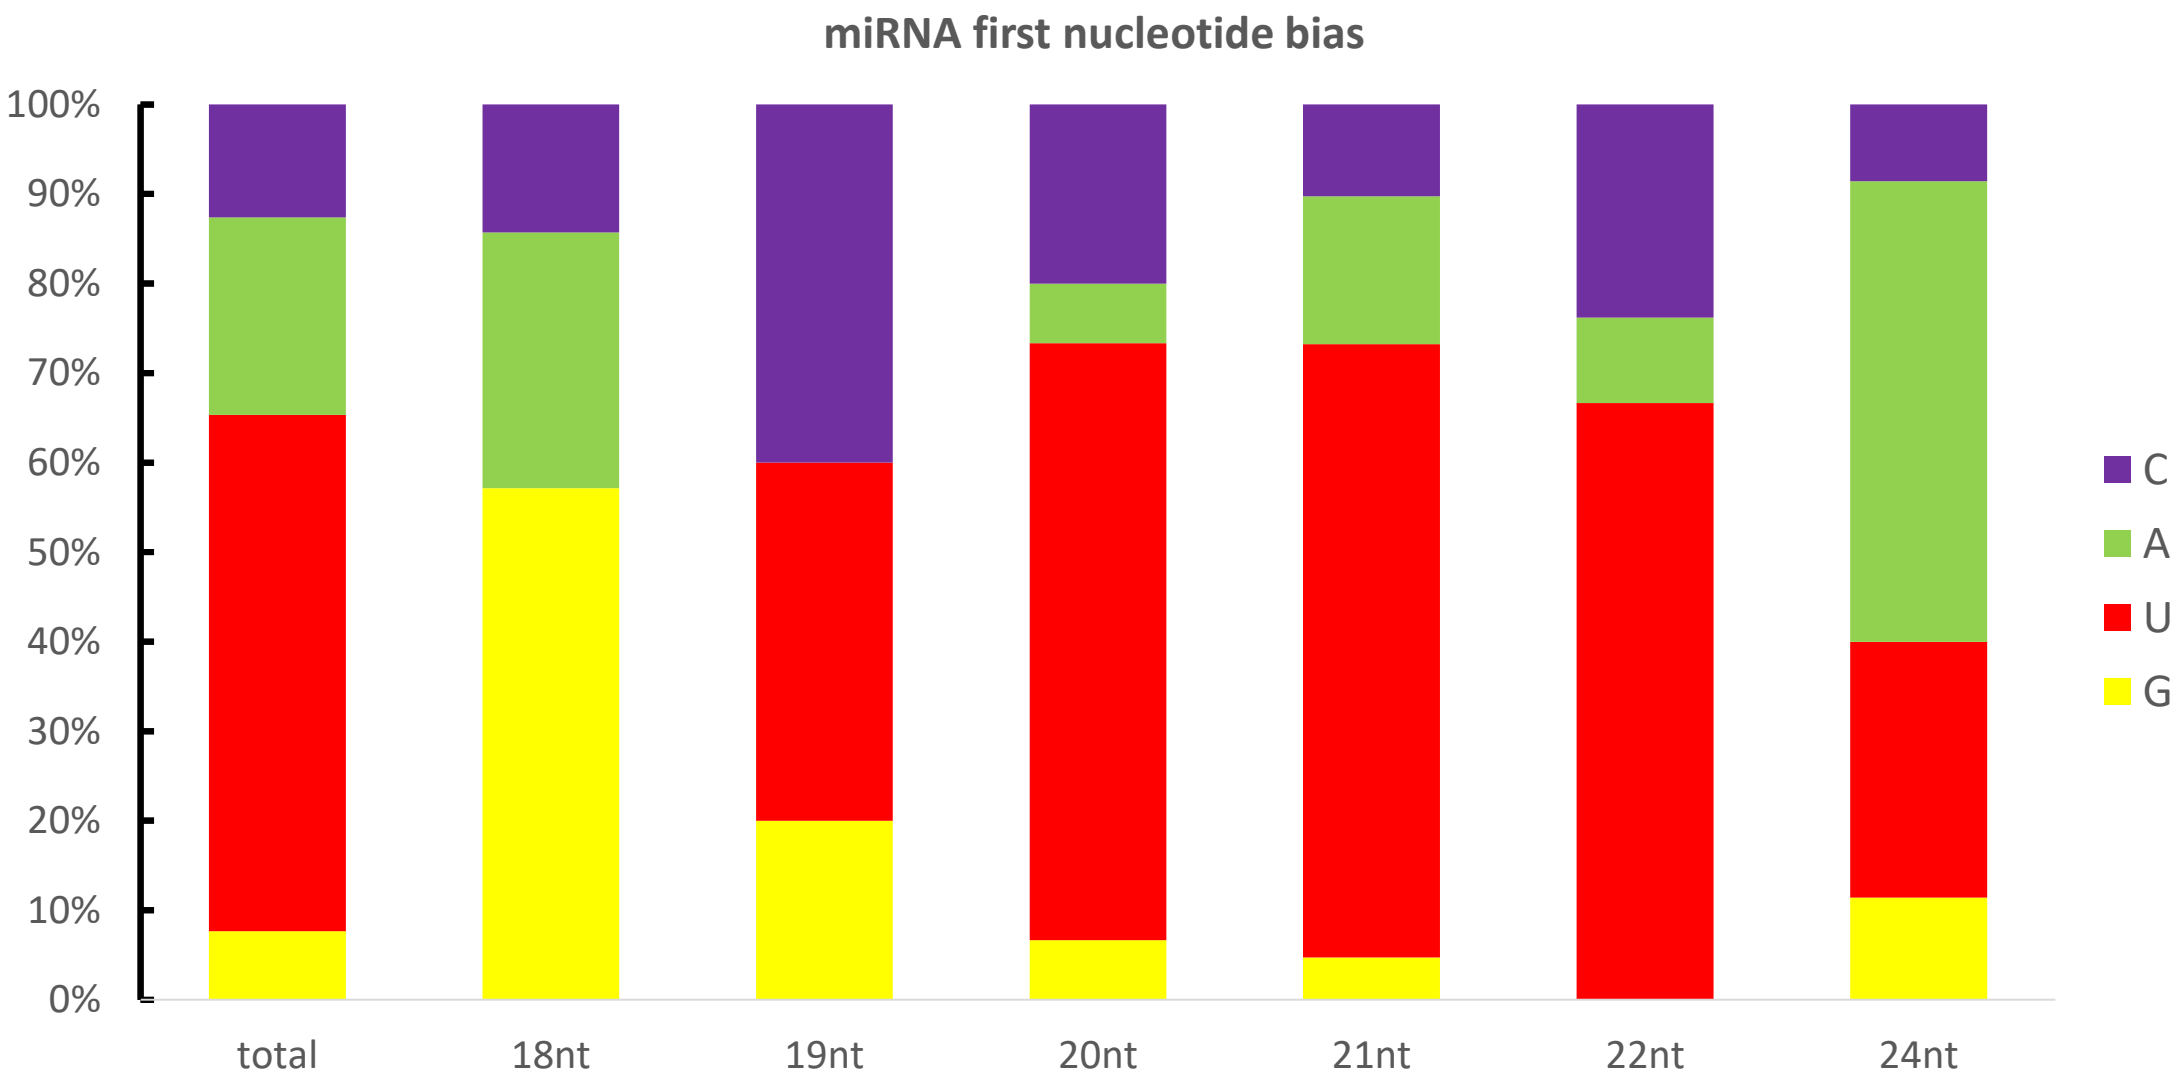

B

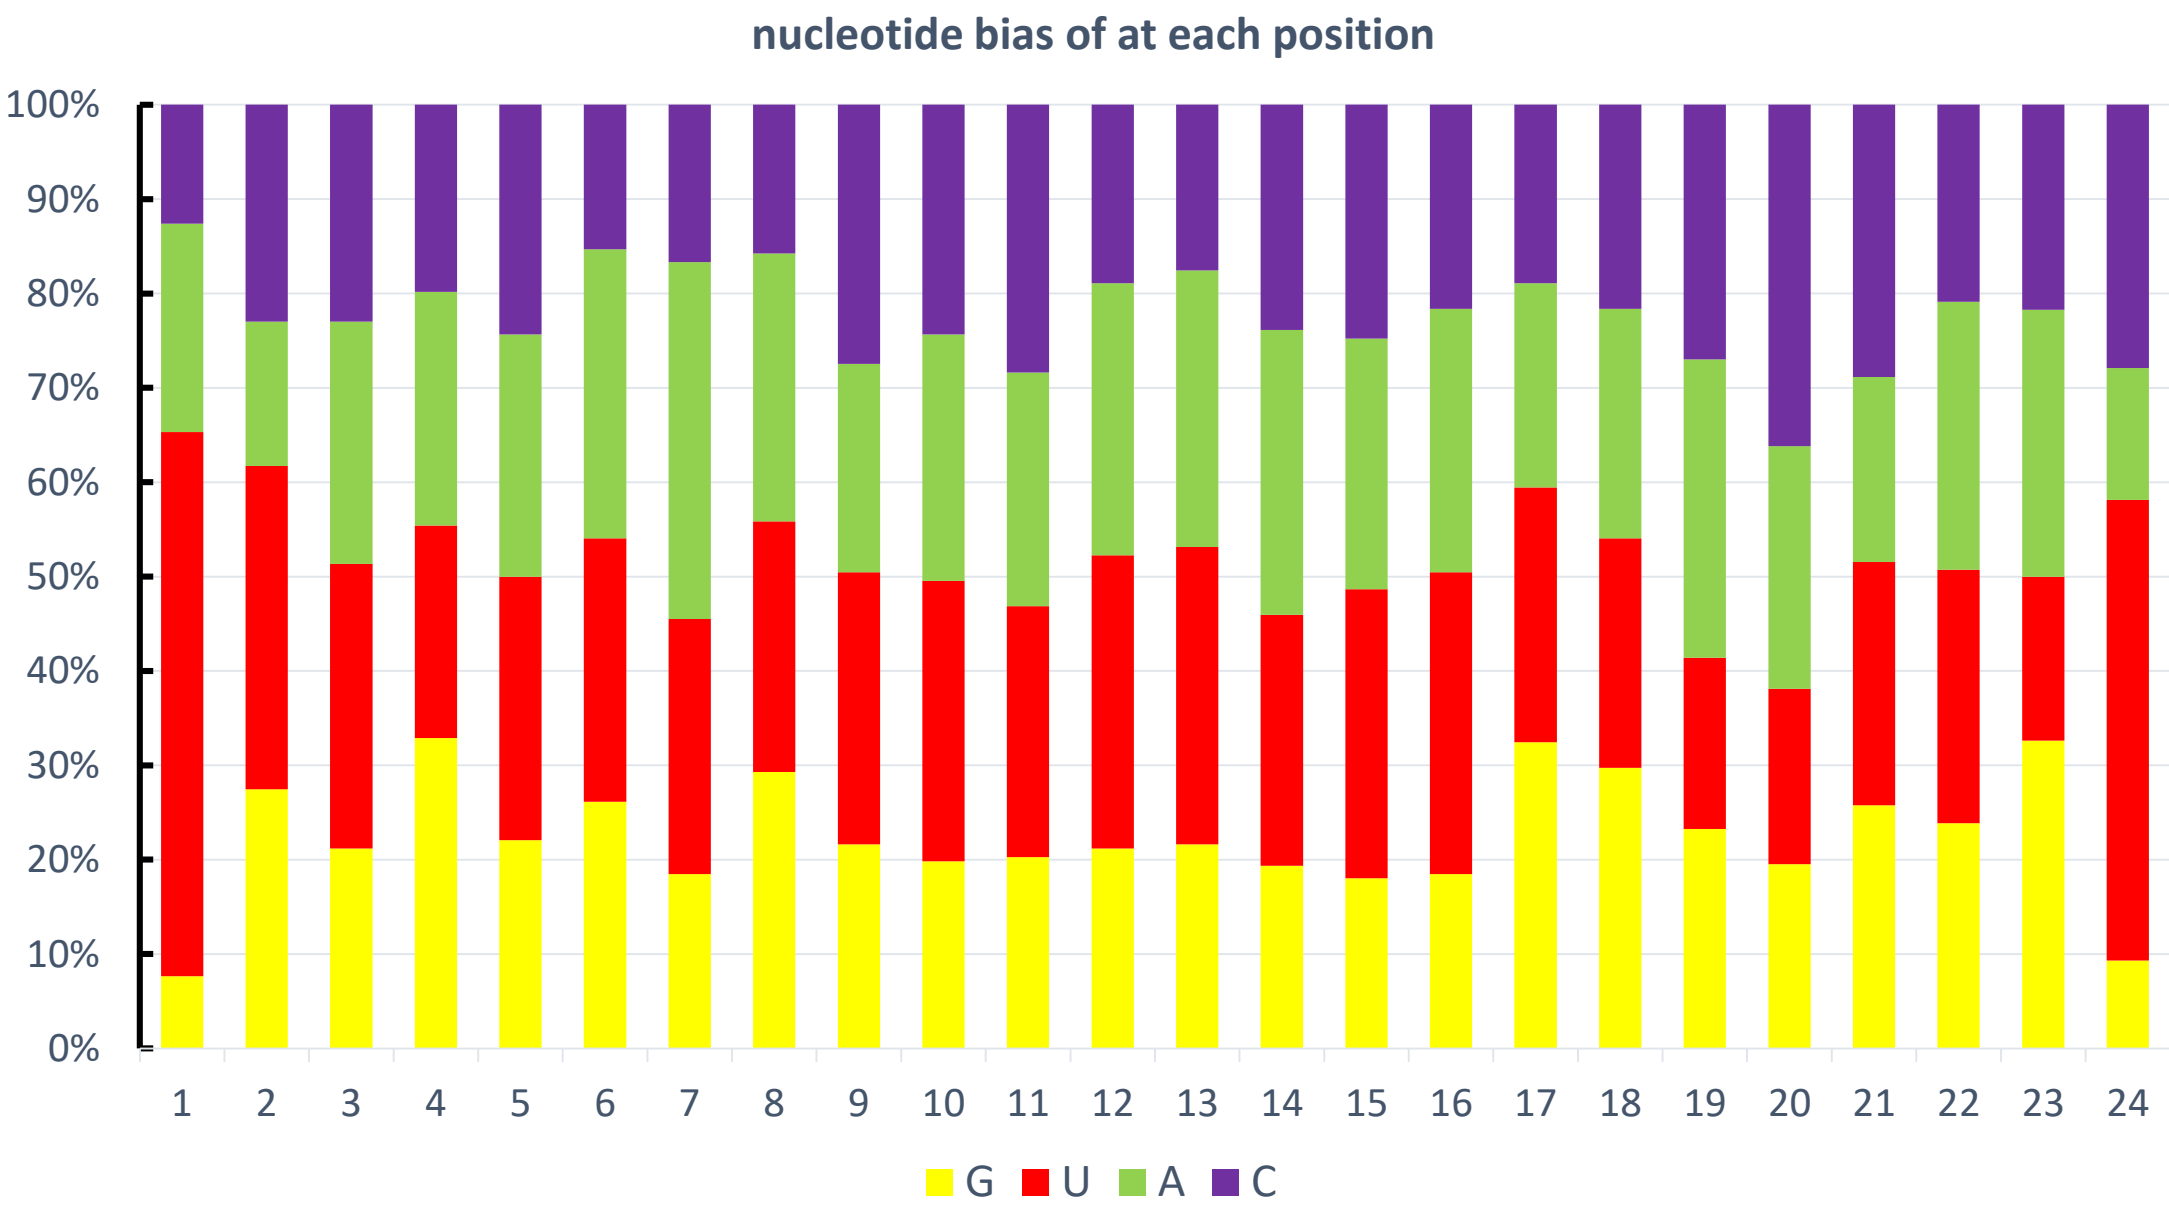

Supplement: s1 [file s1]

Relative Expression Ratio

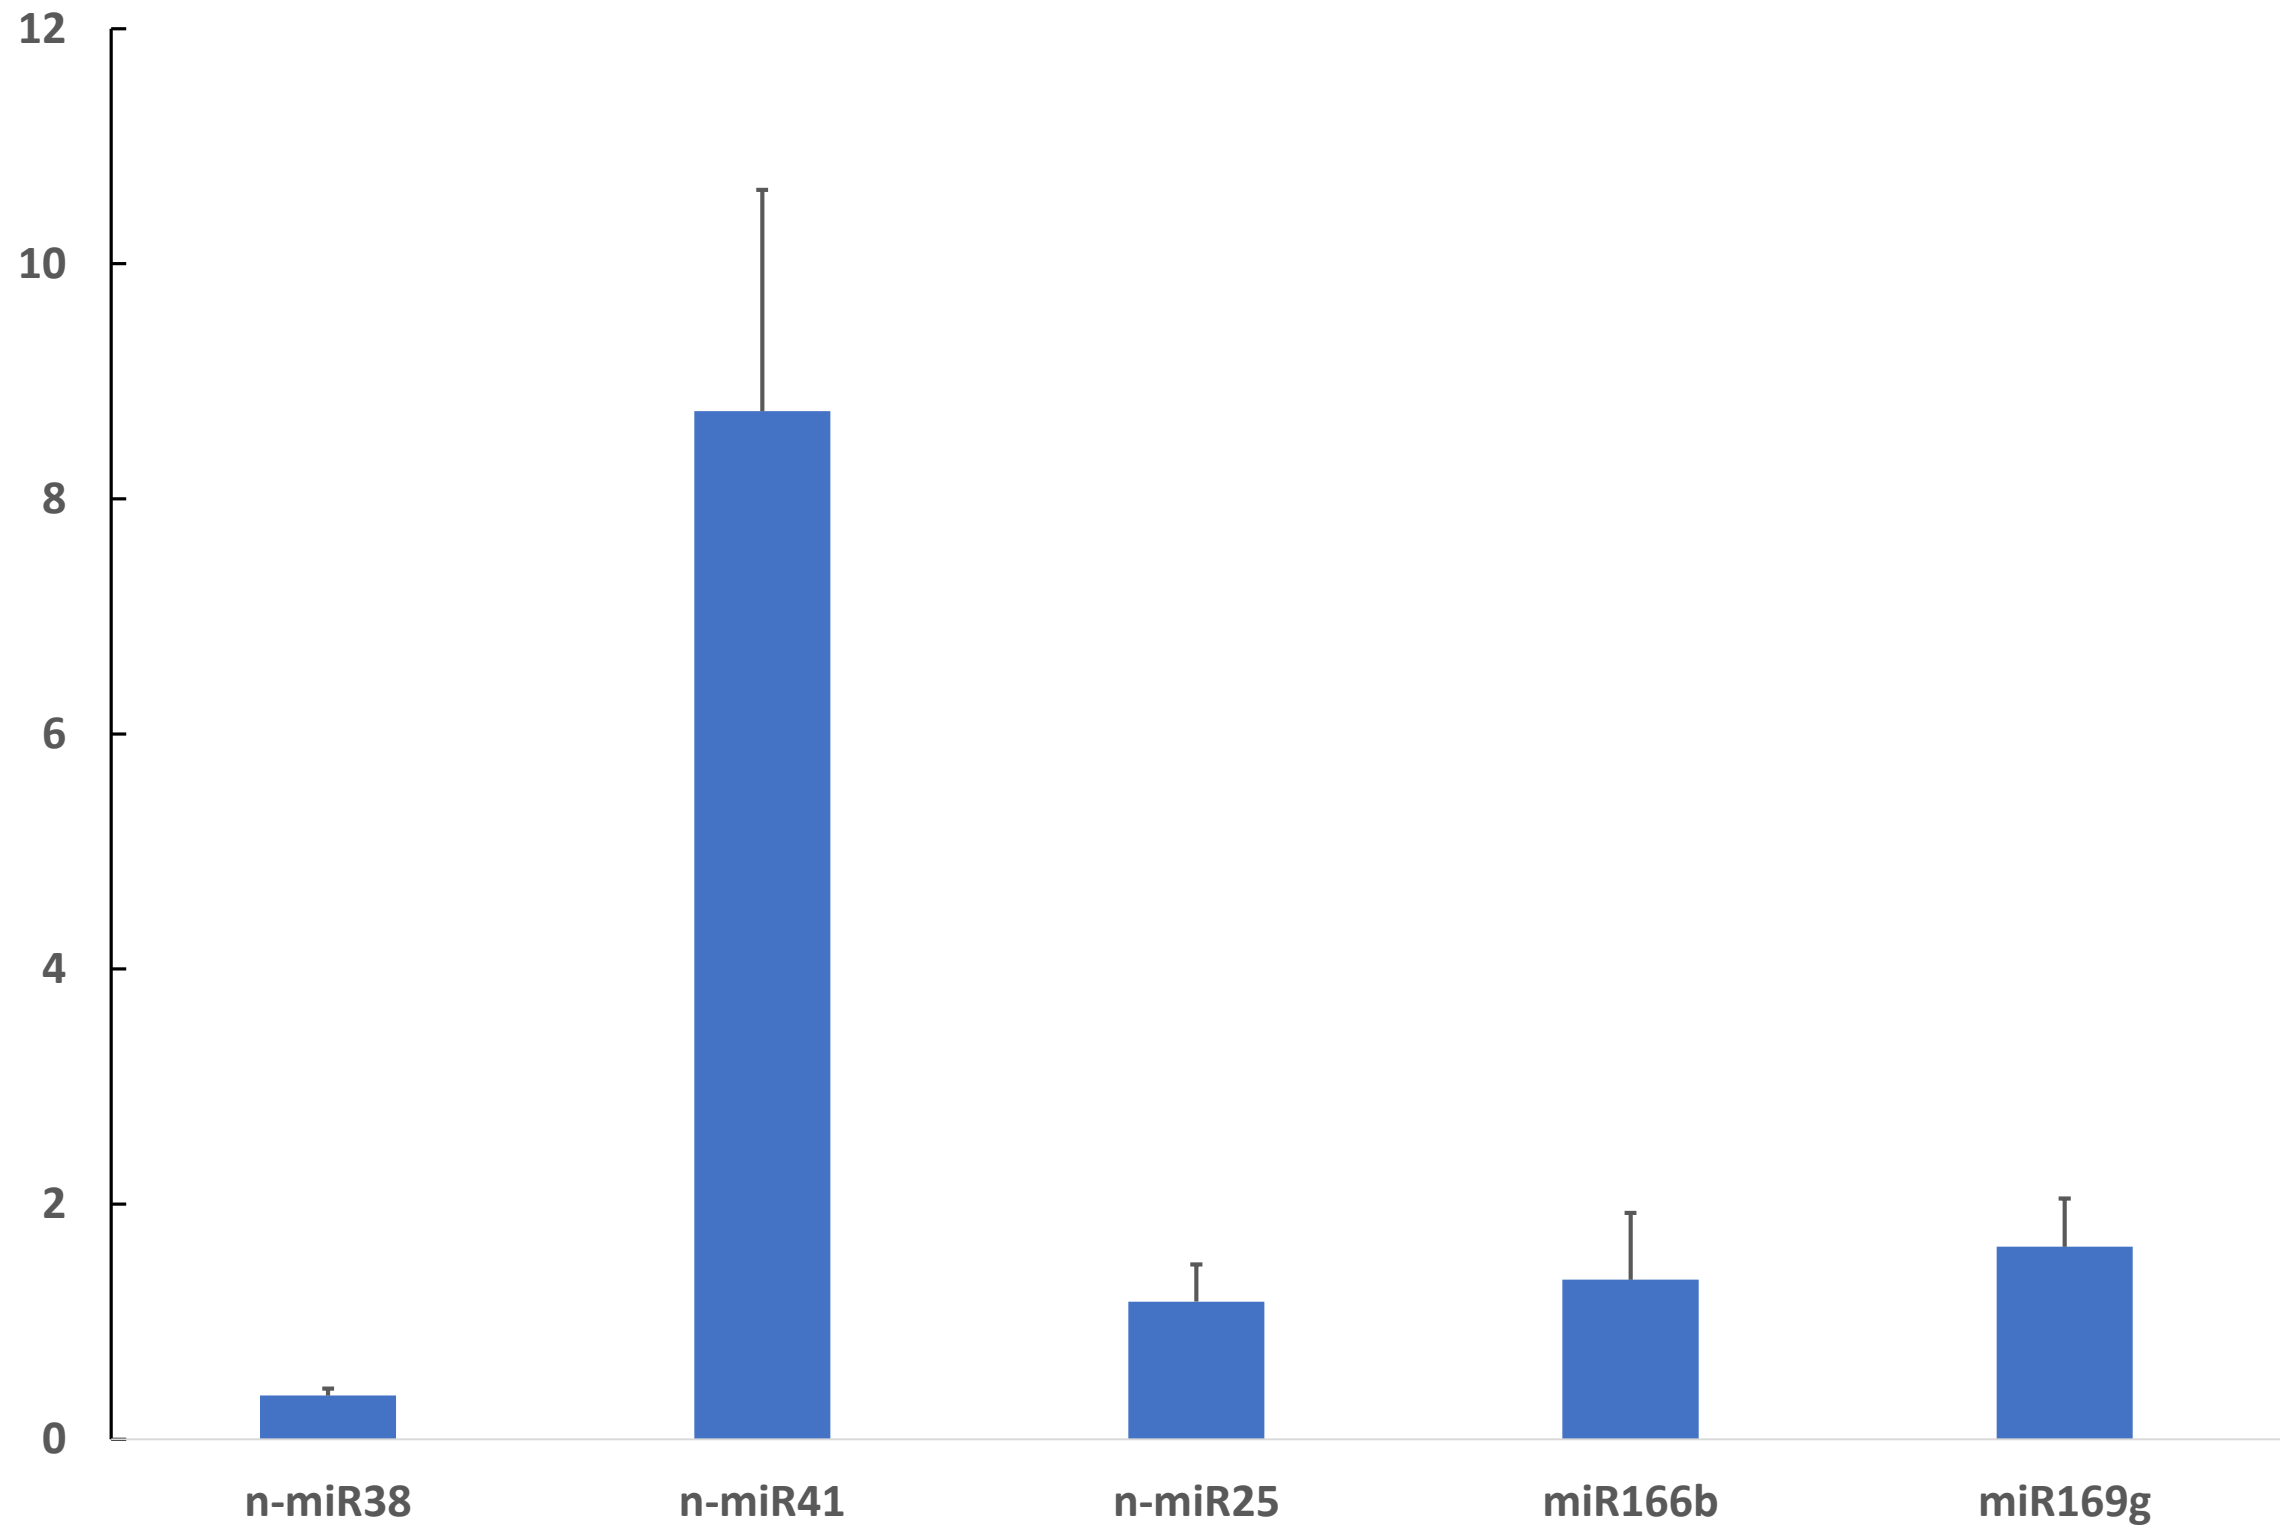

Supplement: s1 [file s1]

A

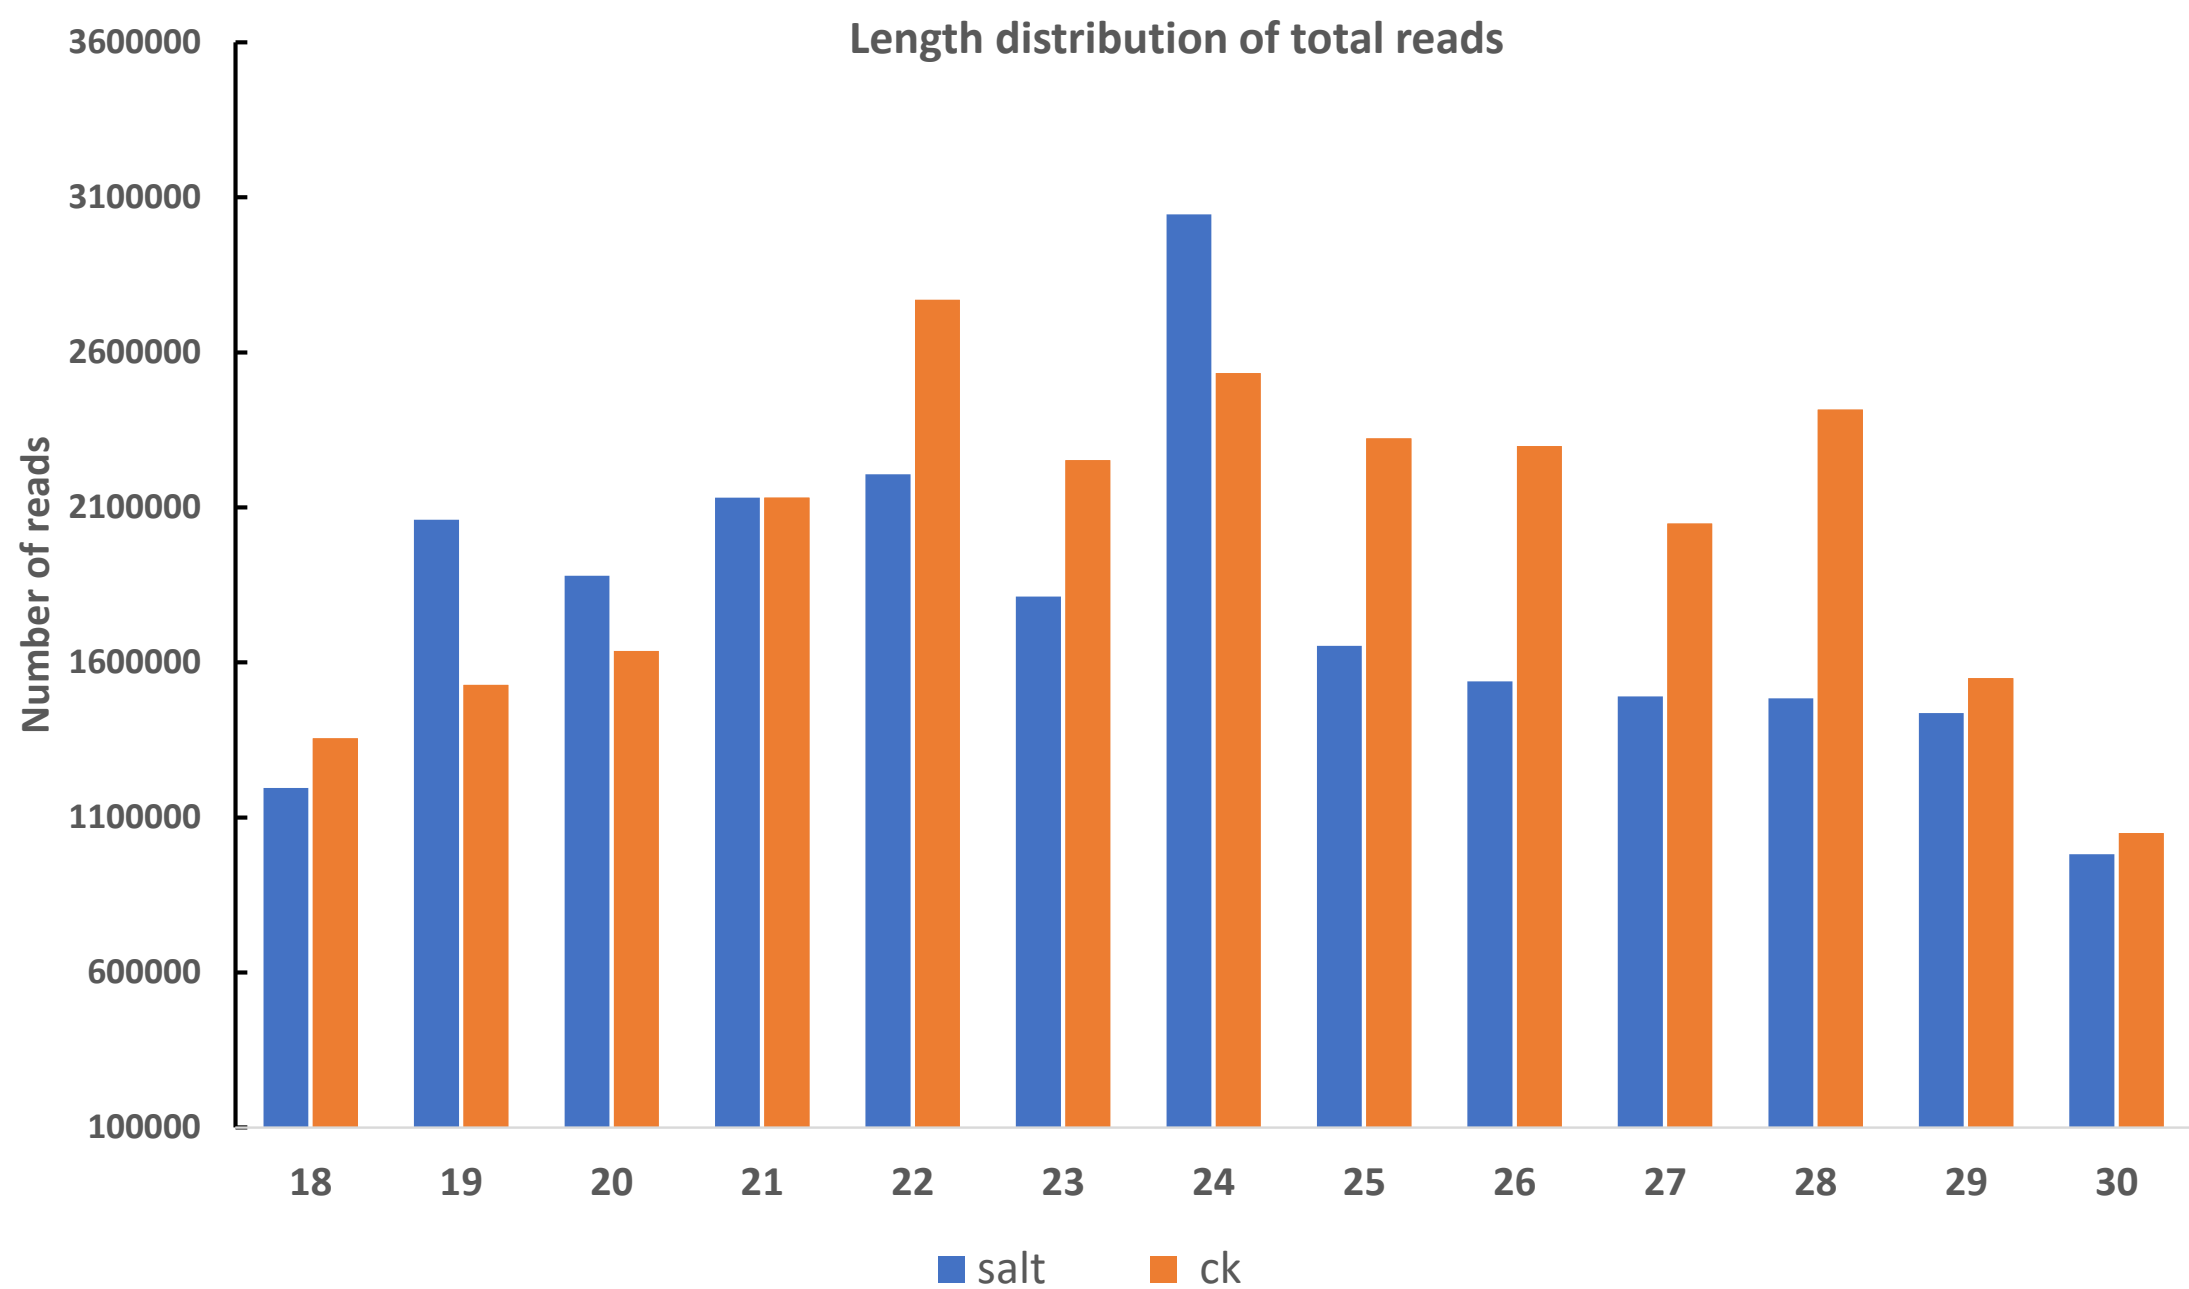

B

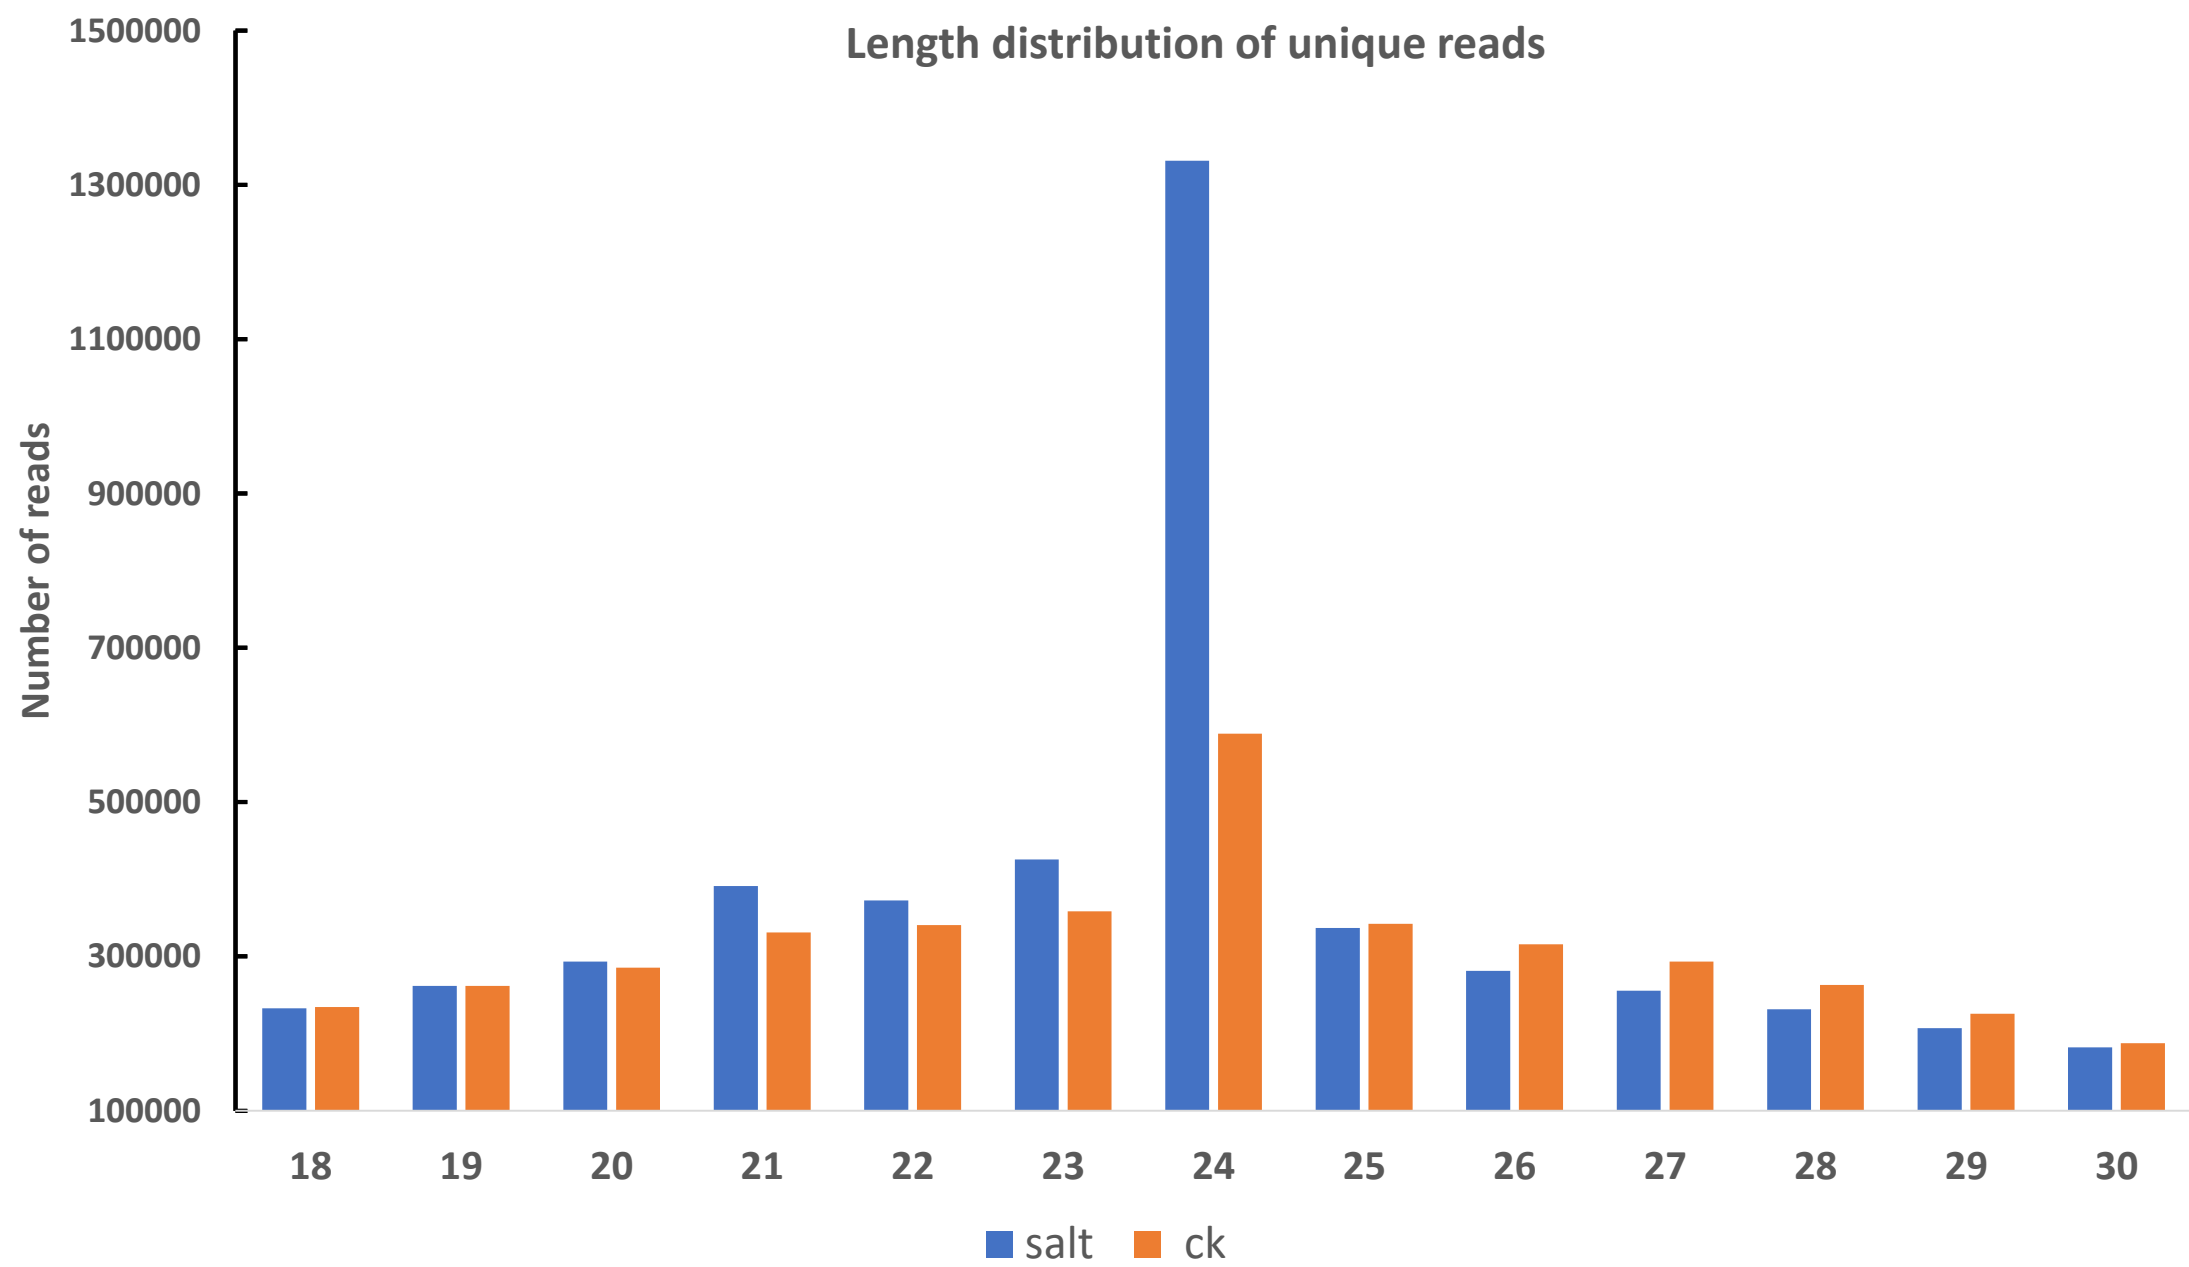

Supplement: s1 [file s1]
